# Supplementary material for: Microtubule dynamics drive enhanced chromatin motion and mobilize telomeres in response to DNA damage
Source: PubMed Central journal article supplement — Mol Biol Cell. 2017 Jun 15;28(12):1701–11. doi: 10.1091/mbc.E16-12-0846 (PMC5469612; doi:10.1091/mbc.e16-12-0846), 2017-06-15
Supplement: supp_E16-12-0846v1_CombinedSupMats.pdf [file supp_E16-12-0846v1_CombinedSupMats.pdf]

# Supplemental Materials

*Molecular Biology of the Cell*

Lawrimore et al.

**Figure S1.** Phleomycin and Zeocin sensitivity. Ten-fold dilutions series on YPD and 0.1  $\mu\text{g}/\text{mL}$ , 1  $\mu\text{g}/\text{mL}$ , and 5  $\mu\text{g}/\text{mL}$  Phleomycin and 1  $\mu\text{g}/\text{mL}$  and 5 $\mu\text{g}/\text{mL}$  Zeocin. All strains are in the KS406 background.

**Figure S2.** NucleaseCutting Efficiency.

We monitored cutting efficiency using quantitative PCR to measure the decrease in intensity of a fragment upon introduction of a DNA double strand break. For I-SceI, the cut site lies in the *LYS2* gene (see Figure 1). (B) KS406 (blue) contains I-SceI and the I-SceI cut site, KS414 (orange) is derived from KS406 and is deleted for *mre11*. *mre11* is part of the RMX DNA repair complex and required for double strand break repair (Lobachev *et al.*, 2004). KS453 (grey) does not contain I-SceI. (D) The uncut *LYS2* fragment (2.1 kb) is shown in samples grown on I-SceI repression conditions (yeast extract, peptone, lactate YPL). I-SceI was induced (galactose, gal) for 3 and 6 hours. The experiments were run in triplicate and fragment intensity (fluorescence units) corrected for input (E). There is an 85% reduction in the fragment containing the *LYS2* by 6 hours following I-SceI induction. This value is consistent with recent reports (Seeber *et al.*, 2016). For HO, the cut site lies to the left of *CEN3* (A). Fragment containing the HO cut site was reduced to 40% of uncut values (C). (F) Efficiency of cutting in nocodazole treated cells. I-SceI was induced for 3 and 6 hours in the presence(grey) or absence(blue) of nocodazole (20  $\mu\text{g}/\text{ml}$ ) in KS406 that contains I-SceI and the I-SceI cut site. The experiments were run in triplicate and fragment intensity corrected for input (LEU2). Data expressed as a ratio of the two fragments was plotted as a function of time on galactose. There is an 89% reduction in the *LYS2* fragment 6 hours following I-SceI induction in the presence or absence of nocodazole.

**Figure S3.** Images of pericentric cohesin in untreated, Phleomycin, sDSB, and Zeocin treated cells. GAL HO induced DSB at MAT (4h galactose), 3  $\mu\text{g}/\text{mL}$  Phleomycin for 30 min and 250  $\mu\text{g}/\text{mL}$  Zeocin for 2 hours. Scale bar, 1  $\mu\text{m}$ .

**Figure S4.** Expansion of Pericentric cohesin is dependent of the DNA checkpoint pathway and histone phosphorylation. (A) Cohesin sagittal width in a *rad9 $\Delta$* . Neither phleomycin treatment (KBY6054) nor induction of a single DSB (KBY6056) caused significant expansion of cohesin (Student's T-test,  $p > 0.05$ ). *rad9 $\Delta$*  untreated (n=33), +phleomycin (n=79), *rad9 $\Delta$*  GALHO no induction (n=43), *rad9 $\Delta$*  GALHO + induction (n=48). (B) Cohesin sagittal width in two histone H2A non-phosphorylatable mutants, S129A(Mec1/Tel1 kinase) (KBY6062) and S121A (Bub1 kinase)(KBY8789). Phleomycin treatment did not cause significant expansion of cohesin in either mutant (Student's T-test,  $p > 0.05$ ). S129A untreated (n= 52), +phleomycin (n=72), S121A untreated (n=23), S121A + phleomycin (n=46). Error bars are standard deviation.

**Figure S5.** Population images of Rad52-GPF foci in WT, *esc1 $\Delta$*  and Phleomycin treated cells. Scale bar, 1  $\mu\text{m}$ .

**Figure S6.** Comparison of MSD curves for 3 second vs 30 second intervals for 10 kb array of lacO/LacI-GFP 6.8 kb from CEN XV (KBY8065). Error bars are standard deviation.

**Figure S7.** Mean squared displacements of mid-beads of polymer simulations. The ensemble mean squared displacement of the middle bead in each of the four chains (A-D) for simulations where the centromere and telomere is fixed in space (blue), the centromere is free to move (orange), and the telomere is free to move (gray). Each condition was run 10 times. Error bars are SEM.

| Strain  | Sample Size | Relevant Genotype/Drug Treatment | Treatment Media | I-SceI Active | Ensemble Averaged Radius of Confinement | Standard Error of the Mean Radii of Confinement |
|---------|-------------|----------------------------------|-----------------|---------------|-----------------------------------------|-------------------------------------------------|
| KS406   | 25          | WT                               | Glucose         | No            | 697                                     | 28                                              |
| KS406   | 61          | Nocodazole                       | Glucose         | No            | 771                                     | 27                                              |
| KS406   | 68          | Phleomycin                       | Glucose         | No            | 828                                     | 30                                              |
| KS406   | 23          | Zeocin                           | Glucose         | No            | 781                                     | 55                                              |
| KS453   | 36          | No Gal1/10 I-SceI                | Galactose       | NA            | 745                                     | 43                                              |
| KS406   | 48          | sDSB                             | Galactose       | Yes           | 918                                     | 81                                              |
| KBY8065 | 43          | WT                               | Glucose         | NA            | 372                                     | 12                                              |
| KBY8065 | 53          | Phleomycin                       | Glucose         | NA            | 402                                     | 21                                              |
| KS421   | 39          | esc1 $\Delta$                    | Glucose         | No            | 810                                     | 46                                              |
| KS418   | 17          | yku70 $\Delta$                   | Glucose         | No            | 857                                     | 90                                              |
| KS419   | 47          | yku70 $\Delta$ esc1 $\Delta$     | Glucose         | No            | 809                                     | 54                                              |
| KS406   | 20          | Nocodazole+sDSB                  | Galactose       | Yes           | 588                                     | 49                                              |
| KS406   | 22          | Latrunculin A + sDSB             | Galactose       | Yes           | 745                                     | 48                                              |
| KBY6091 | 24          | kar9 $\Delta$ + sDSB             | Galactose       | Yes           | 697                                     | 44                                              |
| KBY6093 | 22          | dhc1 $\Delta$ +sDSB              | Galactose       | Yes           | 835                                     | 49                                              |

**Table S1.** Radii of confinement

|         | <b>Relevant Genotype</b>                 | <b>Full Genotype</b>                                                                                                                                                                                                                                                                          |
|---------|------------------------------------------|-----------------------------------------------------------------------------------------------------------------------------------------------------------------------------------------------------------------------------------------------------------------------------------------------|
| KS406   | WT arm locus<br>240kb from<br>CEN2       | MAT $\alpha$ , ade5-1, trp1-289, ura3 $\Delta$ , leu2-3, 112, lys2::insI-Sce1, LacO array next to RAD16 promoter, tetO array next to LYS2 promoter, arg4::hisG Gal1/10 I-Sce1, thr1::HISpLacI-GFP::Nat, ade1::URAp tetR-CFP::Hyg, Spc29-RFP::Bsd                                              |
| KS453   | No Gal1/10 I-Sce1                        | MAT $\alpha$ , ade5-1, trp1-289, ura3 $\Delta$ , leu2-3, 112, lys2::insI-Sce1, LacO array next to RAD16 promoter, tetO array next to LYS2 promoter, arg4::hisG Gal1/10 I-Sce1, thr1::HISpLacI-GFP::Nat, ade1::URAp tetR-CFP::Hyg, Spc29-RFP::Bsd                                              |
| KBY8065 | WT arm locus<br>8.8kb from<br>centromere | MAT $\alpha$ ade2-1 his3-11 trp1-1 ura3-1 leu2-3,112 can1 LacINLSGFP:HIS3 lacO::URA3 (1.8kb from CEN15) Spc29RFP::Hb                                                                                                                                                                          |
| KS421   | esc1                                     | MAT $\alpha$ , ade5-1, trp1-289, ura3 $\Delta$ , leu2-3,112, lys2::insI-Sce1, LacO array next to RAD16 promoter, tetO array next to LYS2 promoter, arg4::hisG Gal1/10 I-Sce1, thr1::HISpLacI-GFP::Nat, ade1::URAp tetR-CFP::Hyg, Spc29-RFP::Bsd, esc1 $\Delta$ ::TRP1                         |
| KS418   | yku70                                    | MAT $\alpha$ , ade5-1, trp1-289, ura3 $\Delta$ , leu2-3,112, lys2::insI-Sce1, LacO array next to RAD16 promoter, tetO array next to LYS2 promoter, arg4::hisG Gal1/10 I-Sce1, thr1::HISpLacI-GFP::Nat, ade1::URAp tetR-CFP::Hyg, Spc29-RFP::Bsd, yku70 $\Delta$ ::KanMX                       |
| KS419   | yku70 esc1                               | MAT $\alpha$ , ade5-1, trp1-289, ura3 $\Delta$ , leu2-3,112, lys2::insI-Sce1, LacO array next to RAD16 promoter, tetO array next to LYS2 promoter, arg4::hisG Gal1/10 I-Sce1, thr1::HISpLacI-GFP::Nat, ade1::URAp tetR-CFP::Hyg, Spc29-RFP::Bsd, yku70 $\Delta$ ::KanMX, esc1 $\Delta$ ::TRP1 |
| KBY6093 | dhc1                                     | MAT $\alpha$ , ade5-1, trp1-289, ura3 $\Delta$ , leu2-3,112, lys2::insI-Sce1, lacO array next to RAD16 promoter, tetO array next to LYS2 promoter, arg4::hisG Gal1/10 I-Sce1, thr1::HISpLacI-GFP:Nat, ade1::URAp tetR-CFP::Hyg, Spc29-RFP::Bsd, dhc1 $\Delta$ ::KAN                           |
| KBY6091 | kar9                                     | MAT $\alpha$ , ade5-1, trp1-289, ura3 $\Delta$ , leu2-3,112, lys2::insI-Sce1, lacO array next to RAD16 promoter, tetO array next to LYS2 promote, arg4::hisG Gal1/10 I-Sce1, thr1::HISpLacI-GFP:Nat, ade1::URAp tetR-CFP:Hyg, Spc29-RFP::Bsd, kar9 $\Delta$ ::KAN                             |
| KBY6047 | Ame1-GFP                                 | MAT $\alpha$ , ade5-1, trp1-289, ura3 $\Delta$ , leu2-3, 112, lys2::insI-Sce1, LacO array next to RAD16 promoter, tetO array next to LYS2 promoter, arg4::hisG Gal1/10 I-Sce1, thr1::HISpLacI-GFP::Nat, ade1::URAp tetR-CFP::Hyg, Spc29-RFP::Bsd, Ame1-GFP::Kan                               |
| WLY8912 | WT                                       | MAT $\alpha$ , trp1 $\Delta$ -63, ura3-52, his3 $\Delta$ 200, lys2-8 $\Delta$ 1, Smc3-GFP::URA3, Spc29-RFP::Hb                                                                                                                                                                                |
| KBY6050 | GALHO                                    | ho $\Delta$ , hml $\Delta$ ::ADE1, MAT $\alpha$ , hmr $\Delta$ ::ADE1, ade1-100, leu2-3,112, lys5, trp::hisG, ura3-52, ade3::GAL::HO, Spc29-RFP::Hb, Smc3-GFP::URA3                                                                                                                           |
| KBY6054 | rad9                                     | MAT $\alpha$ , trp1 $\Delta$ 63, ura3-52, his3 $\Delta$ 200, lys2-8 $\Delta$ 1, Smc3-GFP::URA3, Spc 29-RFP::Hb, rad9 $\Delta$ ::TRP1                                                                                                                                                          |
| KBY6056 | rad9                                     | MAT $\alpha$ , ho $\Delta$ , hml $\Delta$ ::ADE1hmr $\Delta$ ::ADE1, ade1-100, leu2-3,112, lys5, trp::hisG, ura3-52, ade3::GAL::HO, Spc29-RFP::Hb, Smc3-GFP::URA3, rad9 $\Delta$ ::TRP1                                                                                                       |
| KBY6062 | H2AS129A                                 | MAT $\alpha$ , (hta1-htb1) $\Delta$ ::LEU2, (hta2-htb2) $\Delta$ ::TRP1, ura3-52,1, leu2 $\Delta$ 1, lys2 $\Delta$ 1, lys2-128 $\Delta$ , his3 $\Delta$ 200, trp1 $\Delta$ 63, HTA1-S129A-HTB1(HIS3 CEN plasmid), Spc29-RFP::Hb, Smc3-GFP::URA3                                               |
| KBY8786 | H2AS121A                                 | MAT $\alpha$ , (hta1-htb1) $\Delta$ ::LEU2, (hta2-htb2) $\Delta$ ::TRP1, his200, trp163, lys2-188, ura3-52, leu21, HTA1-S121A-HTB1(HIS3 CEN plasmid), Smc3-GFP::URA3, Spc29-RFP::Hb                                                                                                           |
| KBY6100 | Tel3L-GFP                                | MAT $\alpha$ , ade1, met14, ura3-52, leu2-3,112, lys2delta::LacI-GFP-NLS-NATr, his3-11,15, TEL3::LacO::LEU2 (pAFS102), Nup49-RFP::KAN                                                                                                                                                         |
| KBY6102 | Tel3L-GFP<br>esc1                        | MAT $\alpha$ , ade1, met14, ura3-52, leu2-3,112, lys2delta::LacI-GFP-NLS-NATr, his3-11,15, TEL3::LacO::LEU2 (pAFS102),Nup49-RFP::KAN, esc1 $\Delta$ ::Hb                                                                                                                                      |
| KBY6105 | Tel3L-GFP<br>yku70                       | MAT $\alpha$ ade1 met14 ura3-52, leu2-3,112, lys2delta::LacI-GFP-NLS-NATr, his3-11,15, TEL3::LacO::LEU2 (pAFS102), Nup49-RFP::KAN, kan::HIS3, yku70 $\Delta$ ::KAN                                                                                                                            |

|         |                                 |                                                                                                                                                                                                                                                                                   |
|---------|---------------------------------|-----------------------------------------------------------------------------------------------------------------------------------------------------------------------------------------------------------------------------------------------------------------------------------|
| KBY6106 | Tel3L-GFP<br>yku70 esc1         | MATa ade1 met14 ura3-52 leu2-3,112 lys2delta::lacI-GFP-NLS-NATr his3-11,15<br>TEL3::lacO::LEU2 (pAFS102 BsaBI), Nup49-RFP::KAN, kan Δ::HIS3, yku70Δ::KAN,<br>esc1Δ::URA3                                                                                                          |
| KBY6301 | Tel3L-GFP<br>kar9               | MATa ade1 met14 ura3-52 leu2-3,112 lys2delta::lacI-GFP-NLS-NATr his3-11,15,<br>TEL3::lacO::LEU2 (pAFS102 BsaBI), Nup49-RFP::KAN, kan Δ::HIS3, kar9Δ::KAN                                                                                                                          |
| KBY6107 | Tel3L-GFP<br>dhc1               | MATa ade1 met14 ura3-52 leu2-3,112 lys2delta::lacI-GFP-NLS-NATr his3-11,15<br>TEL3::lacO::LEU2 (pAFS102 BsaBI) Nup49-RFP::KAN (isolate 15) kan Δ::HIS3 dhc1<br>Δ::KAN                                                                                                             |
| KBY3584 | Rad52-GFP                       | MATa ade2 ura3-52 leu2Δ1 trp1Δ63 his3Δ200 lys 2-8Δ1 Rad52-GFP::Kan Spc29-<br>CFP::HygB                                                                                                                                                                                            |
| KBY6302 | Rad52-GFP<br>esc1               | MATa ade2 ura3-52 leu2Δ1 trp1Δ63 his3Δ200 lys 2-8Δ1 Rad52-GFP::Kan Spc29-<br>CFP::HygB esc1Δ::TRP1                                                                                                                                                                                |
| KBY8745 | Ame1-GFP                        | MATa ade2 ura3-52 leu2Δ1 trp1Δ63 his3Δ200 lys 2-8Δ1 Spc29-RFP::Hg, Ame1-<br>GFP::Kan                                                                                                                                                                                              |
| KBY8227 | CEN3<br>adjacent HO<br>cut site | MATahmlΔ::ADE1 hmrΔ::ADE1 ade1-100 leu2-3,112 lys5 trp1::hisG' ura3-52<br>ade3::GAL::HO CEN3HOcs::HPH, pFD025 (URA3+) inserted right of CEN3 (NAT-<br>target site inserted 3.1kb downstream of CEN3) pSR12 (lacO/lexA::Leu2 inserted at<br>NAT) His3p::LacI-GFP:NAT Spc29CFP::Kan |
| SGD10.2 | GALCEN3                         | Mat a CEN3(3.8)-GFP[10kb] ade2, ura3, leu2, trp1, his3, can1-100 Cen linked LacO is<br>URA3 tagged, URA3Δ::Nat, GALCEN3::URA3, Spc29-RFP::Hb                                                                                                                                      |

**Table S2.** Strains and Genotypes

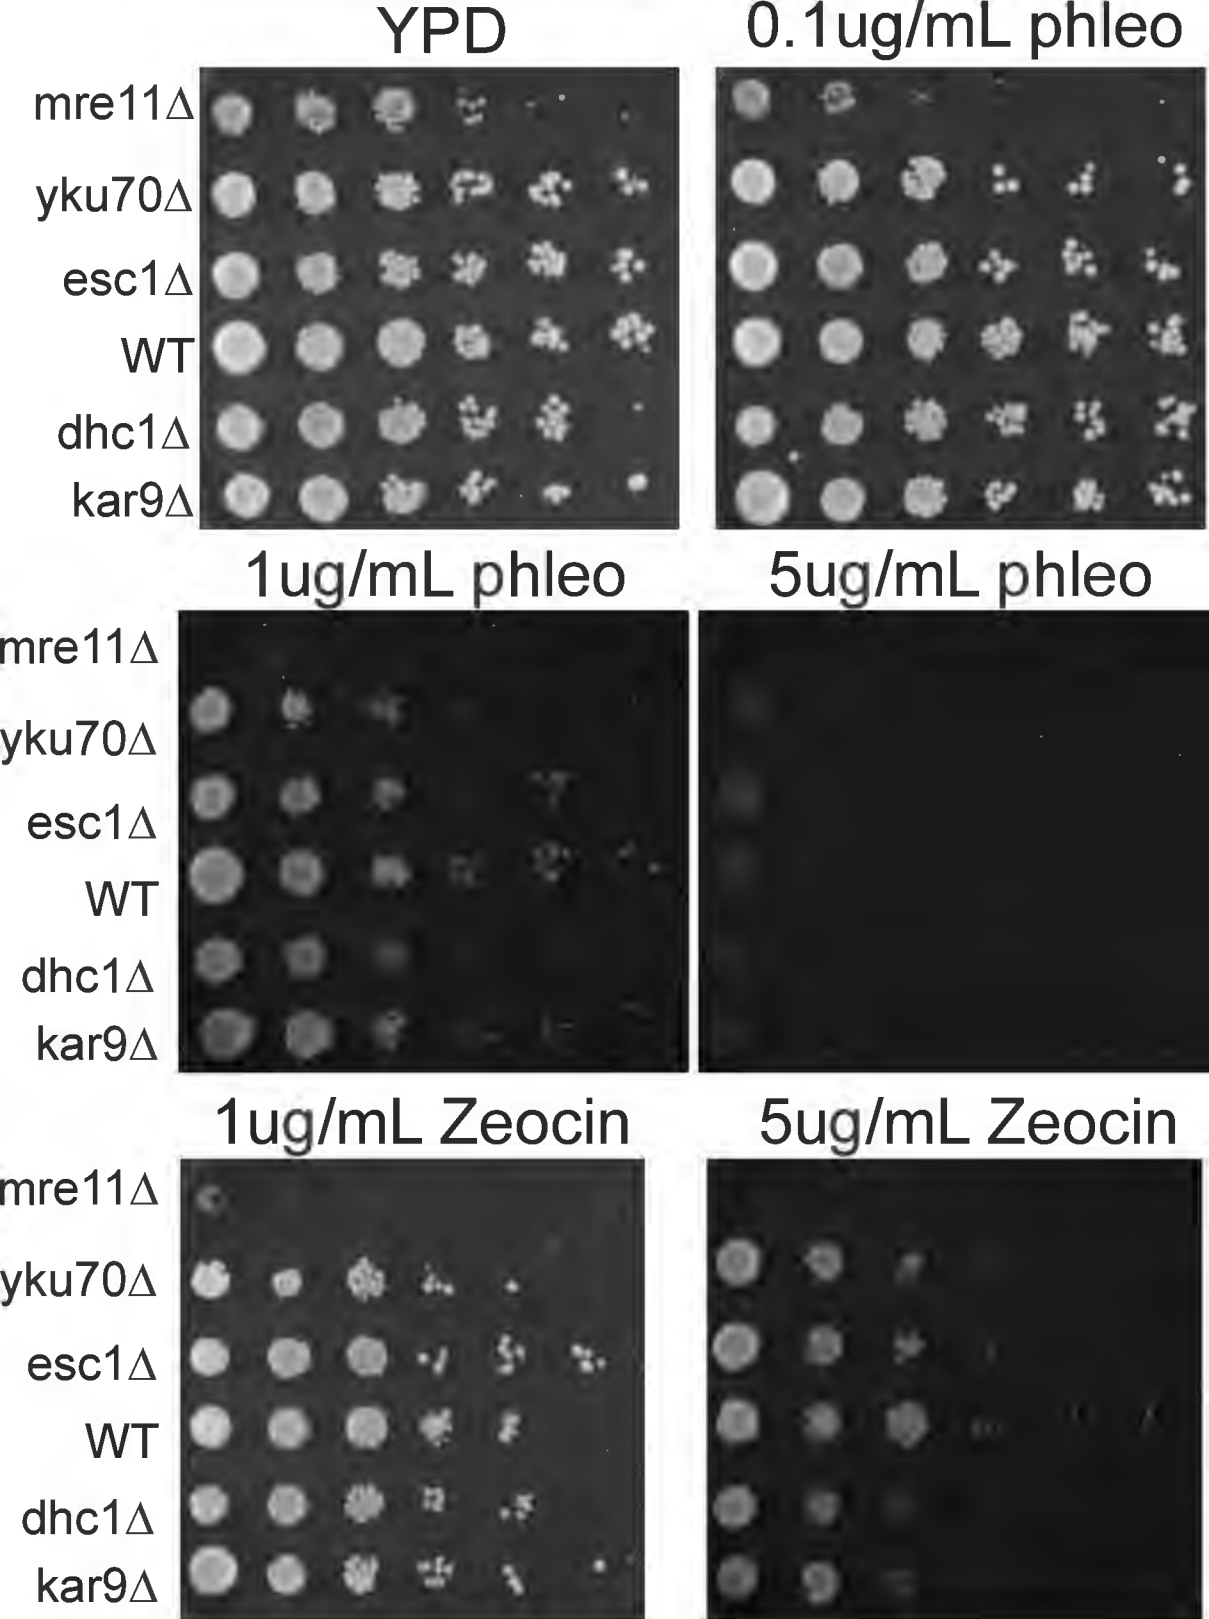

Figure S1

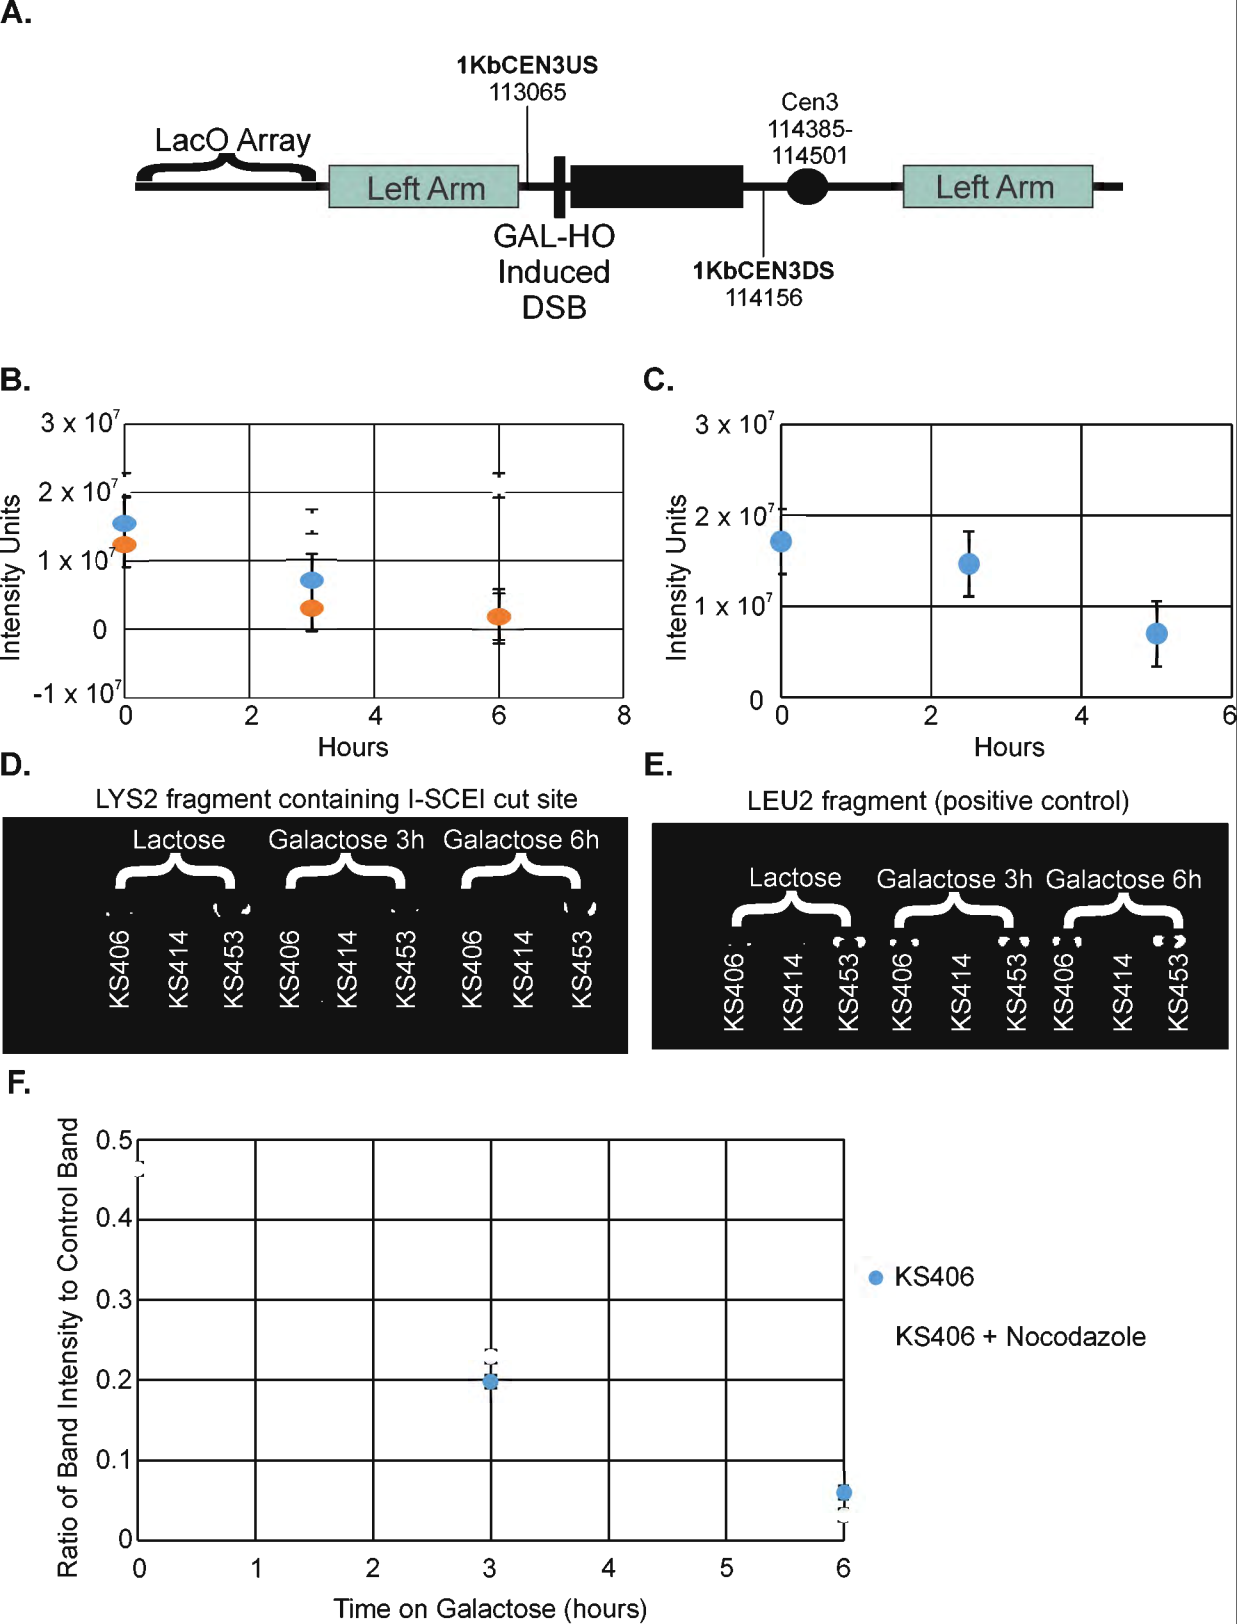

Figure S2

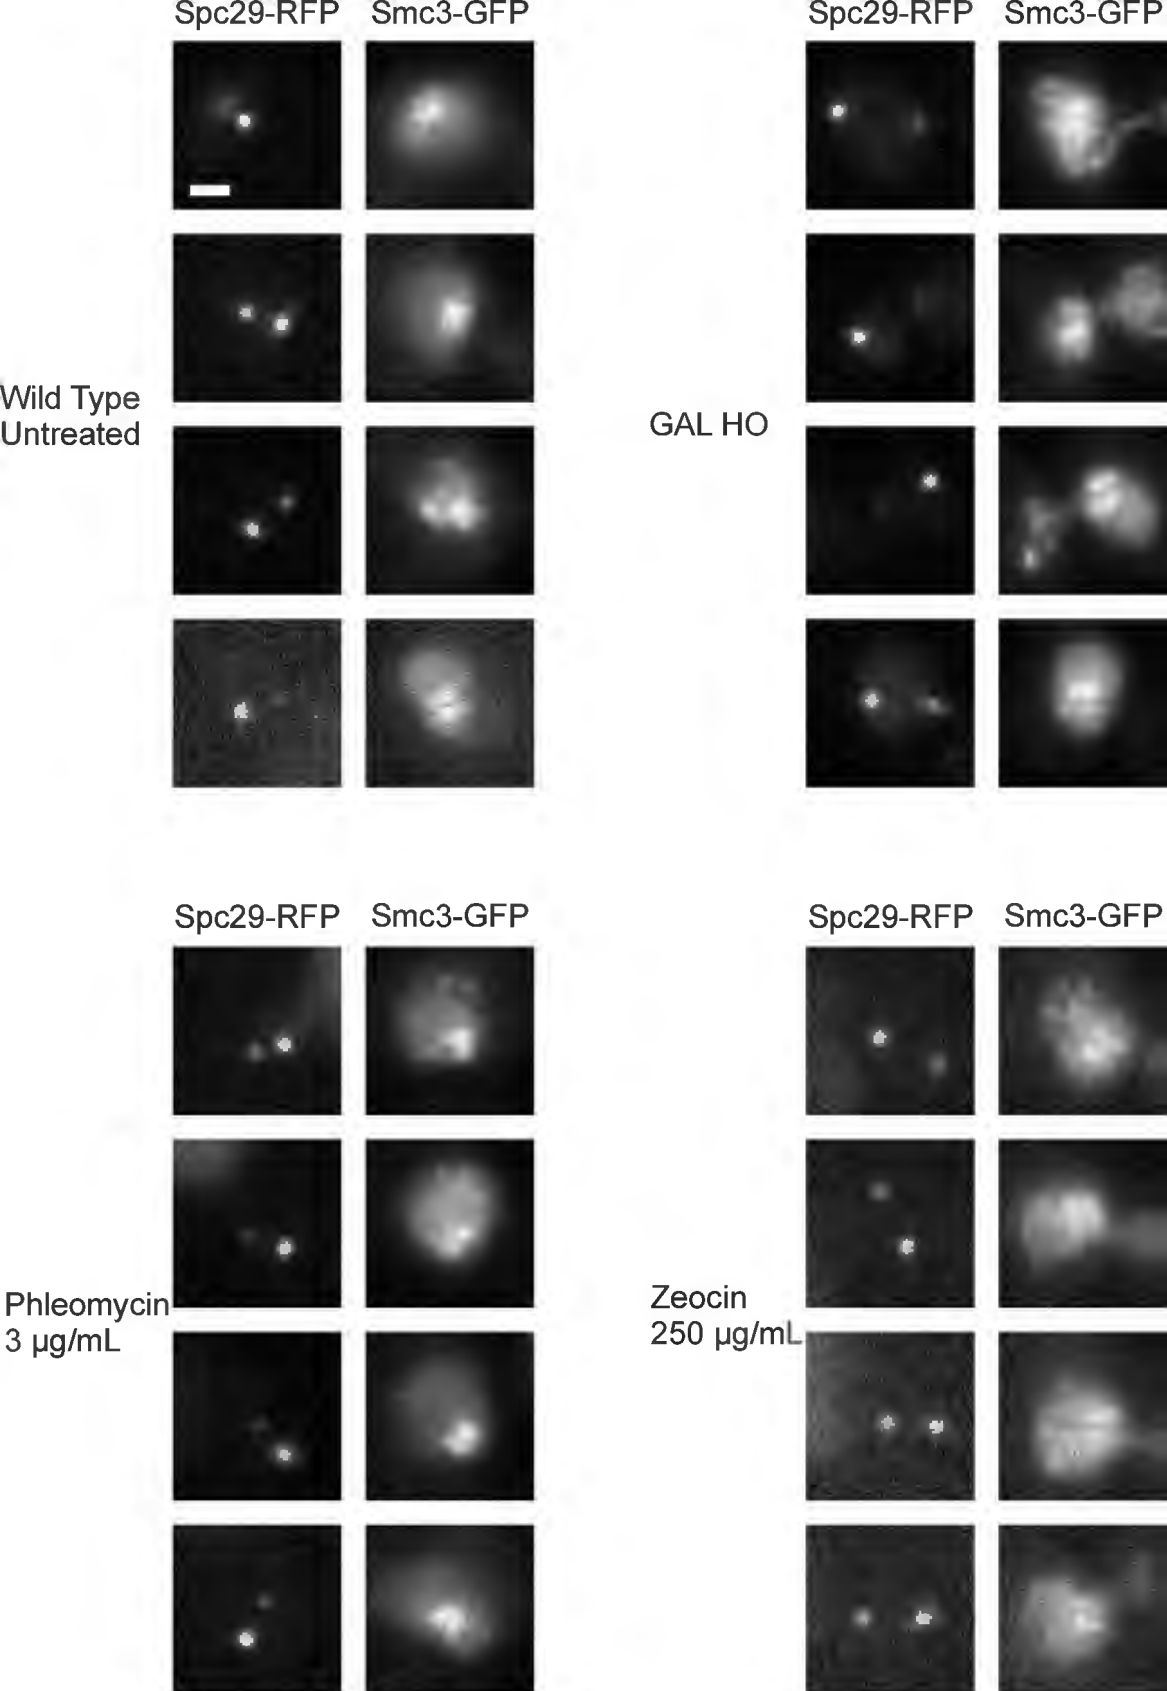

Figure S3



**A.**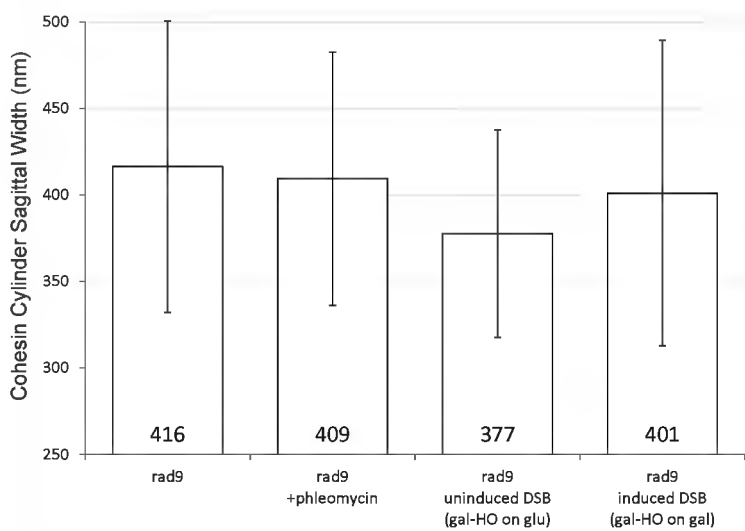**B.**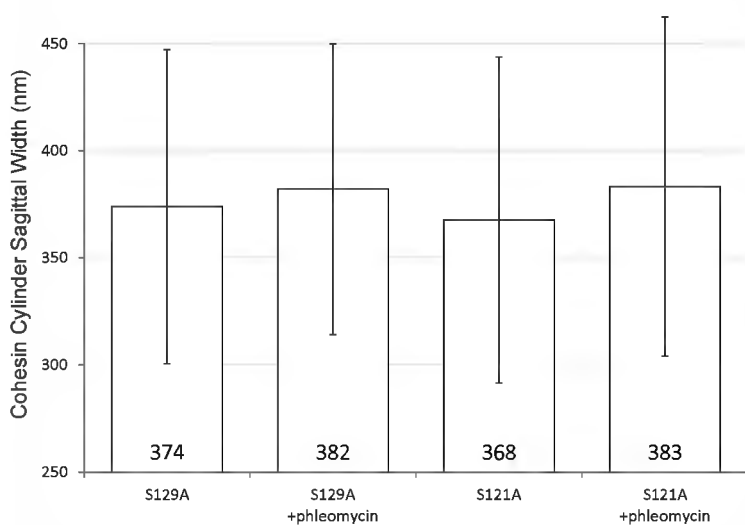**Figure S4**

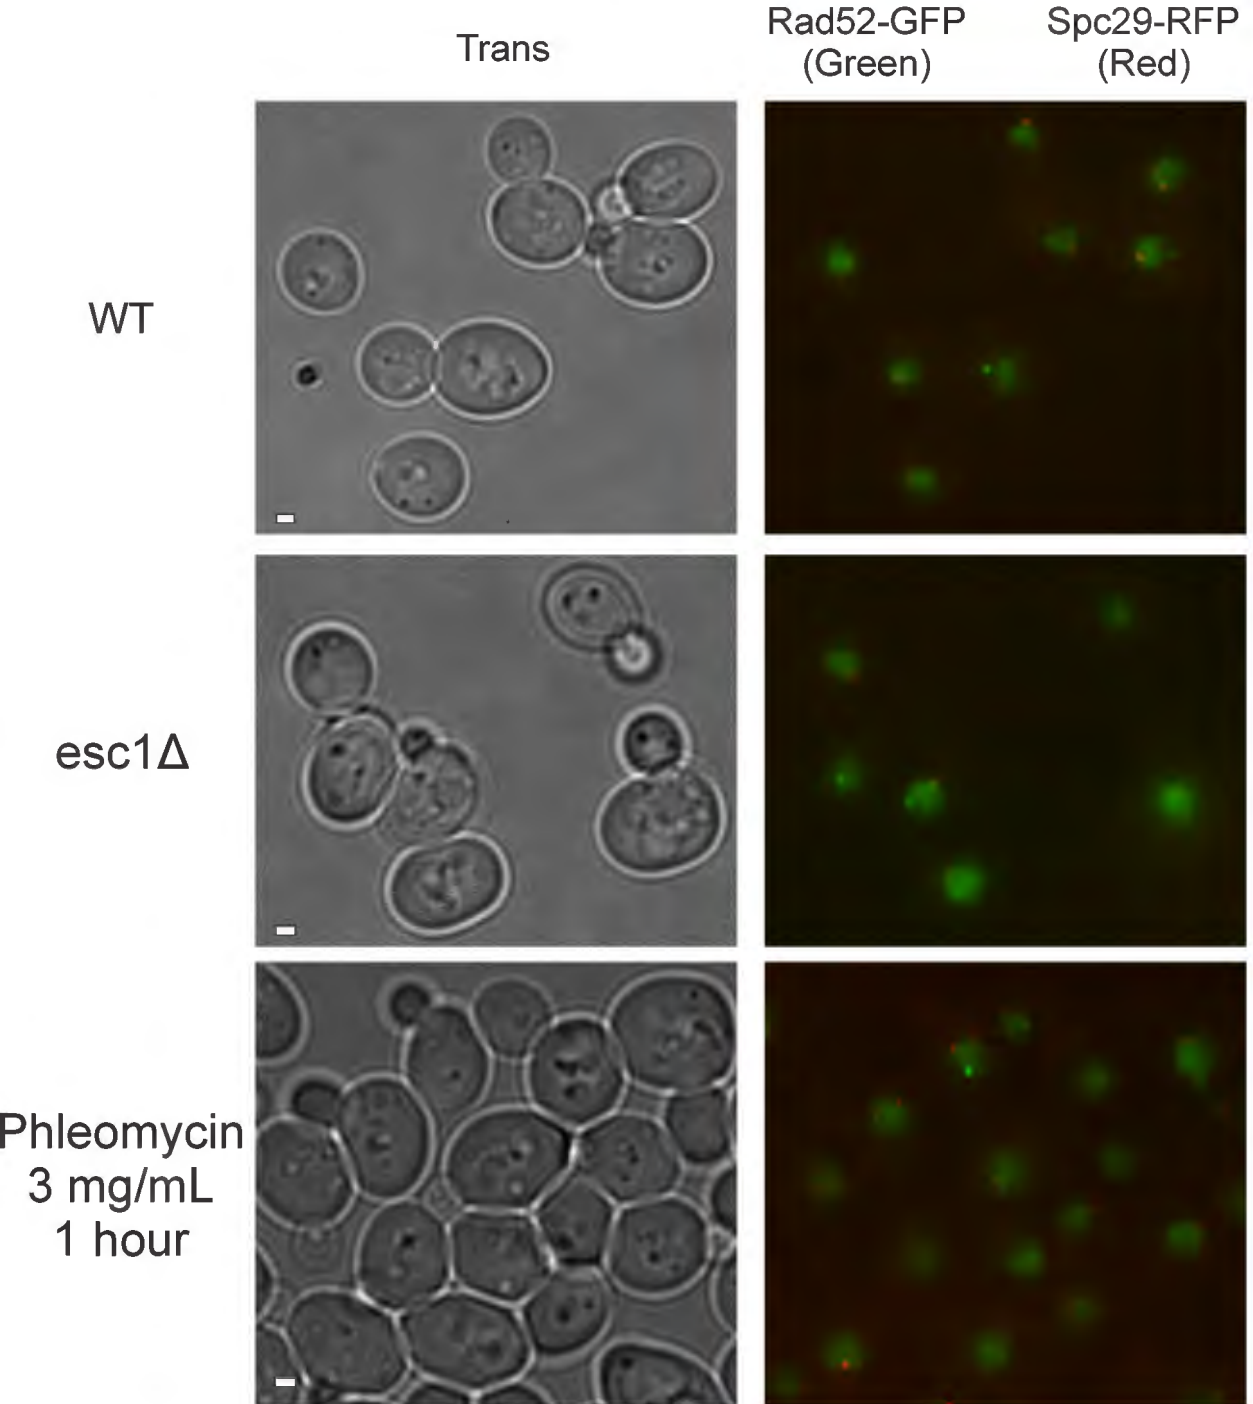

Figure S5

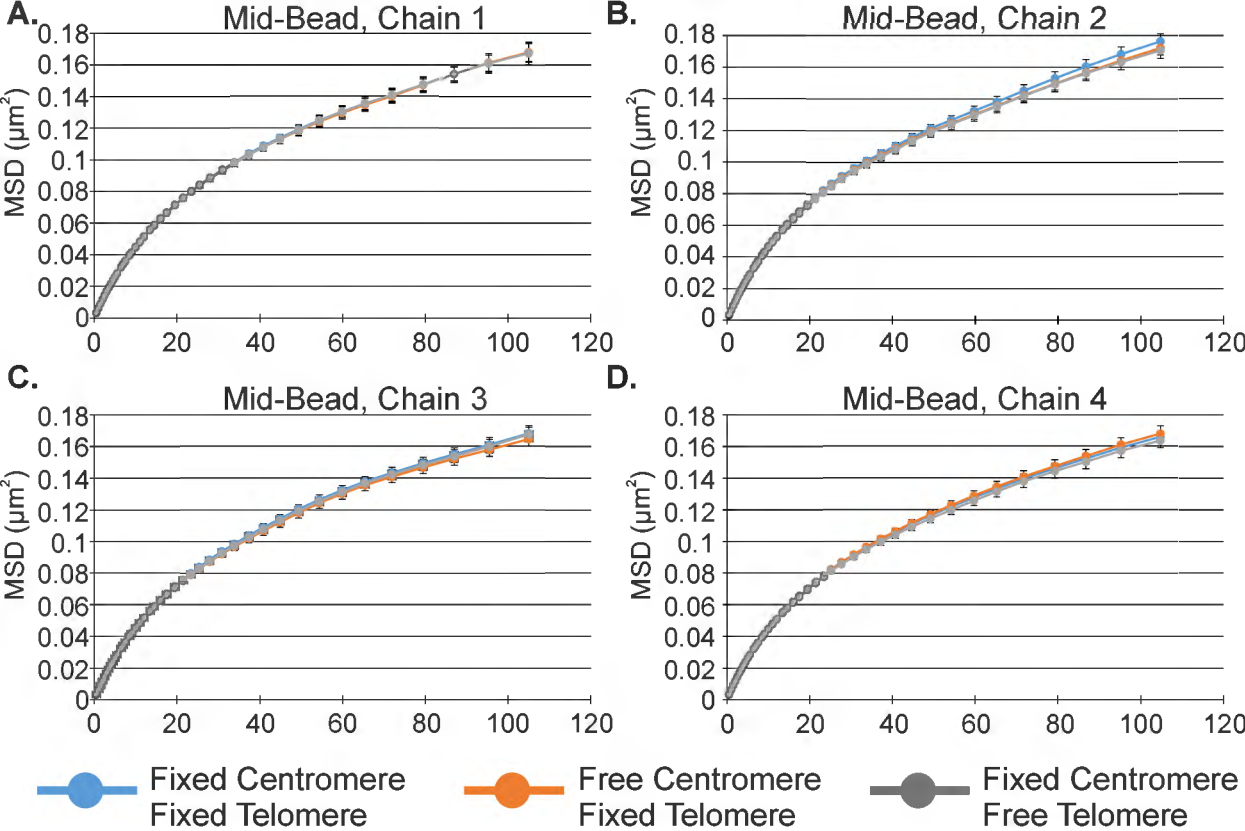

Figure S6

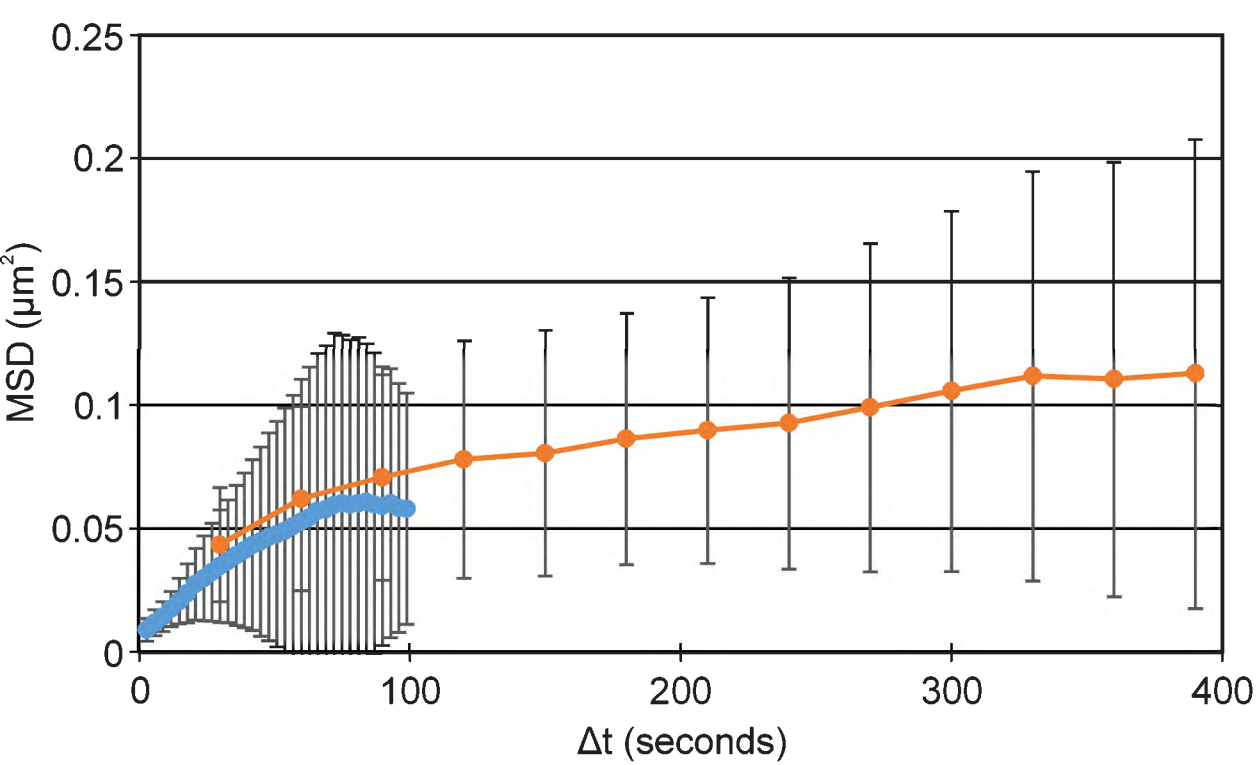

Figure S7
